# Supplementary material for: Effect of Telehealth Treatment by Lay Counselors vs by Clinicians on Depressive Symptoms Among Older Adults Who Are Homebound: A Randomized Clinical Trial
Source: PubMed Central journal article supplement (PMC7489833; doi:10.1001/jamanetworkopen.2020.15648), 2020-08-31
Supplement: jamanetwopen-e2015648-s002.pdf [file jamanetwopen-e2015648-s002.pdf]

# Data Sharing Statement

Choi. Effect of Telehealth Treatment by Lay Counselors vs by Clinicians on Depressive Symptoms Among Older Adults Who Are Homebound. *JAMA Netw Open*. Published August 31, 2020. 10.1001/jamanetworkopen.2020.15648

## Data

**Data available:** Yes

**Data types:** Deidentified participant data, Data dictionary

**How to access data:** Please send request to Dr. Namkee G. Choi at [nchoi@austin.utexas.edu](mailto:nchoi@austin.utexas.edu)

**When available:** With publication

## Supporting Documents

**Document types:** Statistical/analytic code, Informed consent form

**How to access documents:** Please send request to Dr. Namkee G. Choi at [nchoi@austin.utexas.edu](mailto:nchoi@austin.utexas.edu)

**When available:** With publication

## Additional Information

**Who can access the data:** Please send request to Dr. Namkee G. Choi at [nchoi@austin.utexas.edu](mailto:nchoi@austin.utexas.edu)

**Types of analyses:** For educational, research and non-profit purposes after submission of a written request and review by the Principal Investigator (Dr. Namkee Choi).

**Mechanisms of data availability:** after approval of a proposal, and with a signed data access agreement

**Any additional restrictions:** After the investigators complete major analyses of data, other investigators may use the study data for educational, research and non-profit purposes after submission of a written request and review by the Principal Investigator (Dr. Namkee Choi). All data have been de-identified to meet HIPAA and IRB standards and to prevent the disclosure of personal identifiers. Finding must be reported promptly in scientific meetings and publications. The Tele-BA manual is freely available for use by the scientific community and aging-service agencies.
